# Supplementary material
Source: PubMed Central journal article supplement (PMC3020266)
Supplement: NIHMS233028-supplement-01.pdf [file NIHMS233028-supplement-01.pdf]

**Table 2. Reasons for Treatment Failure in the Ahmed Baerveldt Comparison Study**

|                                                            | Ahmed Group    | Baerveldt Group | P - Value <sup>†</sup> |
|------------------------------------------------------------|----------------|-----------------|------------------------|
| Inadequate IOP control without additional glaucoma surgery | 9 (6)          | 6 (5)           | 0.60                   |
| Reoperation for Glaucoma                                   | 11 (8)         | 1 (1)           | 0.006                  |
| Explantation for complication                              | 1 (1%)         | 3 (2%)          | 0.36                   |
| Persistent hypotony*                                       | 0 (0)          | 2 (2)           | 0.23                   |
| Loss of light perception                                   | 2 (1)          | 6 (5)           | 0.16                   |
| <b>Total</b>                                               | <b>23 (16)</b> | <b>18 (14)</b>  | <b>.61</b>             |

Data are presented as number (percentage).

IOP - Intraocular pressure

\* IOP  $\leq$  5 mm Hg at both 6-and 12-month visits

<sup>†</sup> Fisher's Exact Test; N = 276 (does not account for follow-up)
