# Supplementary material
Source: PubMed Central journal article supplement (PMC3020266)
Supplement: NIHMS233028-supplement-03.pdf [file NIHMS233028-supplement-03.pdf]

**Table 5. Number (%) of patients undergoing interventions during the first 12 months of follow-up in the Ahmed Baerveldt Comparison Study**

| Intervention                                       | Ahmed<br>(n = 143) | Baerveldt<br>(n = 133) |
|----------------------------------------------------|--------------------|------------------------|
| Anterior chamber reformation                       | 9 (6)              | 15 (11)                |
| Avastin Injection (neovascular glaucoma stratum)   | 0                  | 2 (1)                  |
| Laser revision of bleb at slit lamp                | 2 (1)              | 0                      |
| Needling at slit lamp                              | 0                  | 1 (1)                  |
| <b>Total Number of Patients with Interventions</b> | <b>10 (7)</b>      | <b>18 (14)</b>         |

Subjects may have had more than one intervention.
